# Supplementary material for: Detection of Viral −RNA and +RNA Strands in Enterovirus-Infected Cells and Tissues
Source: PubMed Central journal article supplement (PMC7761939; doi:10.3390/microorganisms8121928), 2020-12-04
Supplement: microorganisms-08-01928-s001.pdf [file microorganisms-08-01928-s001.pdf]

# Supplementary material for article: Salmikangas et al., 2020. Detection of - and + RNA strands in enterovirus infected cells and tissues.

Supplementary table 1. Antibodies used in IF and bDNA FISH.

| Antibody                                                                | Type                              | Final concentration | Origin                                     |
|-------------------------------------------------------------------------|-----------------------------------|---------------------|--------------------------------------------|
| CVA9-8863 rabbit monoclonal antibody                                    | Primary (rabbit anti-CVA9 capsid) | 1:100               | Merja Roivainen, THL, Helsinki             |
| CVA9-861 rabbit monoclonal antibody                                     | Primary (rabbit anti-CVA9 capsid) | 1:100               | Merja Roivainen, THL, Helsinki             |
| CVA9-K3 rabbit monoclonal antibody                                      | Primary (rabbit anti-CVA9 capsid) | 1:100               | Merja Roivainen, THL, Helsinki             |
| J-2 mouse mono-clonal antibody                                          | Primary (mouse anti-dsRNA)        | 1:8000              | Scicons (Prod.No. 10010200)                |
| Goat anti-Rabbit IgG (H+L) Secondary Antibody, Alexa Fluor 488 (GAR488) | Secondary (goat anti-rabbit)      | 1:400               | Invitrogen/ Molecular Probes, Ref. A-11008 |
| Goat anti-Mouse IgG (H+L) Secondary Antibody, Alexa Fluor 488 (GAM488)  | Secondary (goat anti-mouse)       | 1:400               | Invitrogen/ Molecular Probes, Ref. A-11029 |
| Goat anti-Mouse IgG (H+L) Secondary Antibody, Alexa Fluor 633 (GAM633)  | Secondary (goat anti-mouse)       | 1:400               | Invitrogen/ Molecular Probes, Ref. A-21052 |

Supplementary table 2. ViewRNA in-house/custom probe set sequences used for +RNA (EVAB+) and -RNA (EVAB-) detection. Probe set sequence information of EVAB+ has previously been published in [24].

| Oligo number | EVAB+                       | EVAB-                      |
|--------------|-----------------------------|----------------------------|
| 1            | gactcatggatctccttcattgg     | ccaatgaaggagatccatgagtc    |
| 2            | gcgtccttagtccaacgaatg       | cattcgttgactaaggacgc       |
| 3            | cataccctgagtaataaaaagcaa    | ttgcttttgattactcagggtatg   |
| 4            | aaccaaacaggactaagactagcat   | atgctagtcttagctctgttgggt   |
| 5            | taaggtaaactgagtcatttaggctac | gtagcctaaatgactcagttacctta |
| 6            | acaggtggccaaaagtcattc       | gaatgacttttgccacctgt       |
| 7            | tgtacatcatggttctgtgttagg    | cctacacacagaacctgatgtaca   |
| 8            | tctgcttgggtgggaaat          | atttccaaccaaagcagga        |
| 9            | gattttggcagagatcatccataa    | ttatggatgatctctgcaaaatc    |
| 10           | aatagtacatgtctttccatctg     | cagatgggaaagacatgtcacttt   |
| 11           | tctggaggtagtgagtacacactgg   | ccagtggtactcactacctccaga   |
| 12           | tgtacctcaaaagtgatctggg      | cccagatcactttgatgggtaca    |
| 13           | tatgtcttcatgggcatgaca       | tgtcatgccatgaaagacata      |
| 14           | ttggtccatctgattgattcatg     | catgaatcaatcagatggaccaa    |
| 15           | gatcttgggtgttcttggatct      | agatccaagaacaccaagatc      |

---

|    |                            |                             |
|----|----------------------------|-----------------------------|
| 16 | taggcacagtgagcgacat        | atgtgcgctcactgtgccta        |
| 17 | cctgttacaccttcagcattagtg   | cactaatgctgaagggtgacaagg    |
| 18 | cctgaattgatccaagtcaatcc    | ggattgacttgatcaattcagg      |
| 19 | catcatcacatgatcaatcat      | atgattgcatatggtgatgatgtg    |
| 20 | ggccatgggtatgatgcaat       | attgcatcatacccatggcc        |
| 21 | ctggtgccagaacaccctg        | cagggtgttctggcaccag         |
| 22 | tgttggatcattgagttgaagatg   | catctcaactcaatgatcaacaaca   |
| 23 | ttgcacaggtagtaatgtagttg    | caactacattgactacctgtgcaa    |
| 24 | tgtctctgtacaggtggggag      | ctcccaccactgtacagagaca      |
| 25 | cagaccatactgtccatgcact     | agtgcattggacaagtatggtctg    |
| 26 | tcacataagtaccattgtagggt    | aacctaccaatggtgacttatgtga   |
| 27 | ccttgttcatcattgaagtagtgct  | agcactactcaatgatgaacaagg    |
| 28 | gagctctcaatgaactcgatttct   | agaaatcgagttcattgagagctc    |
| 29 | ggtgtgccaccagggttca        | tgaacctgggtggcacacc         |
| 30 | ttgtacatgagcattctcttgggtg  | caccaagagaatgctcatgtacaa    |
| 31 | gctagcacagcctcattgacct     | aggtaatgaggctgtgctagc       |
| 32 | ggggaactgtctggtgtaatt      | aattaacaccagcaagttcccc      |
| 33 | tgtaaaagtggaaatctccttgct   | agcaaggagattccactttgaca     |
| 34 | tgtacatggaaataactcaatgttca | tgaacattgaagttatttccatgtaca |
| 35 | ctctcttgcctcagctgcat       | atgcagctgaggcaagagag        |
| 36 | tcacttcttcaaggagaaca       | tgttctccttgagaagaagatga     |
| 37 | tcagtgaactcttgagccacc      | ggtggctcaagaagttcactga      |
| 38 | ccttgaggcattggtcatc        | gatgaccaatgctgcaagg         |
| 39 | tgatggctatccactccatgc      | gcatggagtggatagccatca       |
| 40 | agccactcaataaatttctgaattt  | aaattcagaaattattgagtggtc    |
| 41 | cacactaccactggtttgtgg      | ccacaaaccagtgggtagtggtg     |
| 42 | gcagagttgcccgttacga        | tcgtaacgggcaactctgc         |
| 43 | ccaagtagtcggttccgct        | agcggaaaccgactactttgg       |
| 44 | aagaataaaaggaaacacggacac   | gtgtccgtgttcttttattctt      |
| 45 | ttgtaccataagcagccaatat     | atattggctgcttatggtgacaa     |
| 46 | caatagctatatgtaacaatcttcaa | ttgaaagattgtaccatatagctattg |
| 47 | ggggaacagaagtgttcat        | atcaagcacttctgtttcccc       |
| 48 | ccaacgcagccaccgc           | gcggtggctgcgttgg            |
| 49 | cccatgggcaggccg            | cggcctgccatggg              |
| 50 | gagcgtcccatgggttgc         | gcaacctatgggacgctc          |
| 51 | ctcttcgaccatgtcagtattg     | caatactgacatggtgcaagag      |
| 52 | gtgagcagtctattgatactcagtc  | ggactgagtatcaatgactgctcac   |
| 53 | acgttttctccttcaaccgc       | gcggttgaaggagaaaacgt        |
| 54 | agtagttggccggtaacga        | tcgttaccggccaactact         |
| 55 | tcatggtgttactaggttctcga    | tcgagaaacctagtaacaccatga    |
| 56 | agcgaaacactccgcaactt       | aagttgcggagtgtttcgtc        |
| 57 | cctgatctacactgggtgctg      | cagcaccctagtagatcagg        |
| 58 | ggaatgcggtgactcatcga       | tcgatgagtcaccgcattcc        |
| 59 | cacggtcgcctgtg             | ccacgggcgaccgtg             |
| 60 | ccagagtgtagcggcctg         | actgggcgctagcactctgg        |
| 61 | gcgcacaaaggtaccgtgata      | tatcacggtaccttgtgcgc        |

---

**Supplementary table 3.** Components of the RT reaction.

| <b>Reagent</b>                                    | <b>Amount (<math>\mu</math>l)<br/>per sample</b> | <b>Final<br/>concentration</b> | <b>Origin</b>                                   |
|---------------------------------------------------|--------------------------------------------------|--------------------------------|-------------------------------------------------|
| Nuclease free water                               | 9.0                                              | -                              | Alfa Aesar (Ref. J71786)                        |
| 5x RT-buffer                                      | 8.0                                              | 1x                             | Promega (Ref. M5301)                            |
| 2.5 mM dNTP mix with dATP,<br>dTTP, dCTP and dGTP | 8.0                                              | 0.5 mM each                    | Promega (Ref. U1330)                            |
| 10 $\mu$ M ENRI (3+ or 4-) primer                 | 4.8                                              | 1.2 $\mu$ M                    | Thermo Scientific Custom<br>Standard DNA Oligos |
| RNase inhibitor                                   | 0.1                                              | 4 units                        | Promega (Ref. N2518)                            |
| RT-enzyme (M-MLV RT [H-])                         | 0.1                                              | 20 units                       | Promega (Ref. M530A)                            |
| RNA template                                      | 10.0                                             | -                              | Viral RNA extraction                            |
| <b>Total</b>                                      | <b>40.0</b>                                      | <b>-</b>                       | <b>-</b>                                        |

**Supplementary table 4.** Components of the qPCR reaction.

| <b>Reagent</b>            | <b>Amount (<math>\mu</math>l)<br/>per sample</b> | <b>Final<br/>concentration</b> | <b>Origin</b>                                   |
|---------------------------|--------------------------------------------------|--------------------------------|-------------------------------------------------|
| Nuclease free water       | 4.5                                              | -                              | Alfa Aesar (Ref. J71786)                        |
| iQ SYBR Green Supermix    | 12.5                                             | 1x                             | Bio-Rad (Ref. 1708886)                          |
| 10 $\mu$ M ENRI 4- primer | 1.5                                              | 0.6 $\mu$ M                    | Thermo Scientific Custom<br>Standard DNA Oligos |
| 10 $\mu$ M ENRI 3+ primer | 1.5                                              | 0.6 $\mu$ M                    | Thermo Scientific Custom<br>Standard DNA Oligos |
| cDNA template             | 5.0                                              | 1:500                          | RT-reaction                                     |
| <b>Total</b>              | <b>25.0</b>                                      | <b>-</b>                       | <b>-</b>                                        |

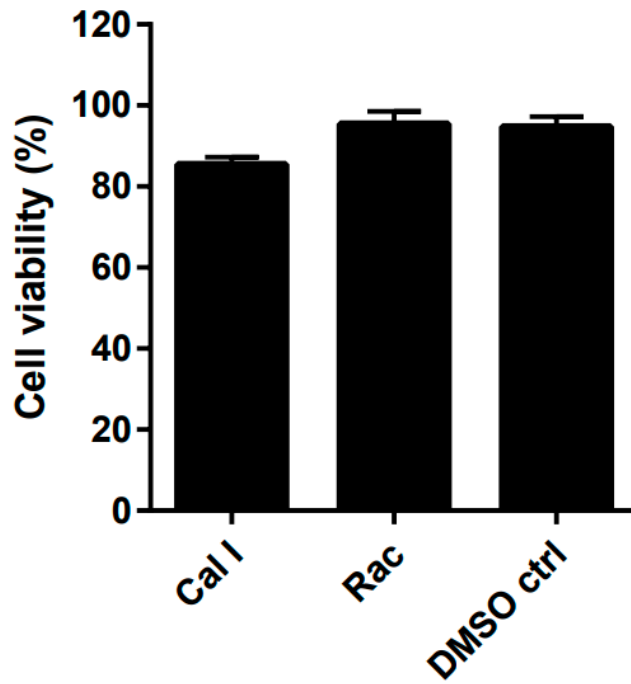

**Supplementary figure 1.** Cell viability assay for the antiviral drugs Cal-I1 and Rac1-I. After a 5-hour incubation, the antiviral drug Cal-I1 lowers cell viability by ~10%, and the antiviral drug Rac1-I doesn't lower cell viability, compared to a DMSO control.

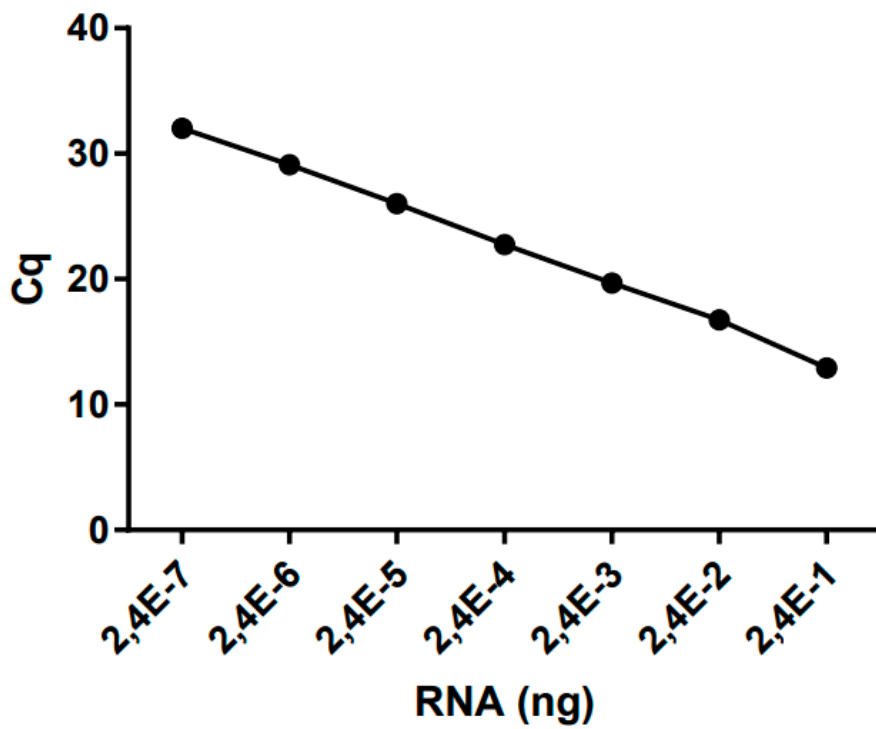

**Supplementary figure 2.** A concentration series of RNA isolated from purified CVA9 and detected by qPCR. 10-fold dilutions were used, triplicate samples were measured and the average Cq-values from the triplicates were plotted against the RNA amounts.
